# Supplementary material for: 1-D helical chain, 2-D layered network and 3-D porous lanthanide–organic frameworks based on multiple coordination sites of benzimidazole-5,6-dicarboxylic acid: synthesis, crystal structure, photoluminescence and thermal stability
Source: Royal Society of Chemistry journal article supplement (doi:10.1039/c3ce40184g), 2013-01-01
Supplement: c3ce40184g.pdf [file c3ce40184g.pdf]

**Table S1** Selected bond lengths (Å) for coordination polymers **1–8**<sup>a</sup>

| <b>1</b> <sup>a</sup> |          |                               |          |                               |          |                  |  |
|-----------------------|----------|-------------------------------|----------|-------------------------------|----------|------------------|--|
| Pr(1)–O(2)#1          | 2.395(4) | Pr(1)–O(3)#1                  | 2.522(4) | Pr(1)–O(7)                    | 2.557(5) |                  |  |
| Pr(1)–O(1)            | 2.489(4) | Pr(1)–O(4)#2                  | 2.537(4) | Pr(1)–N(1)#4                  | 2.601(5) |                  |  |
| Pr(1)–O(5)            | 2.501(4) | Pr(1)–O(6)#3                  | 2.539(5) | Pr(1)–O(3)#2                  | 2.639(4) |                  |  |
| <b>2</b> <sup>b</sup> |          | <b>3</b> (Ln=Ho) <sup>c</sup> |          | <b>4</b> (Ln=Tb) <sup>d</sup> |          |                  |  |
| Yb(1)–O(1)            | 2.258(3) | Ln(1)–O(4)(2)#1               | 2.329(3) | 2.320(4)                      |          |                  |  |
| Yb(1)–O(4)#1          | 2.290(3) | Ln(1)–O(3)#2                  | 2.356(3) | 2.346(4)                      |          |                  |  |
| Yb(1)–O(3)#2          | 2.292(3) | Ln(1)–O(7)                    | 2.445(4) | 2.357(4)                      |          |                  |  |
| Yb(1)–O(8)            | 2.341(3) | Ln(1)–O(1)                    | 2.297(4) | 2.381(3)                      |          |                  |  |
| Yb(1)–O(5)#3          | 2.349(3) | Ln(1)–O(5)                    | 2.406(3) | 2.402(4)                      |          |                  |  |
| Yb(1)–O(6)            | 2.356(3) | Ln(1)–O(6)                    | 2.389(3) | 2.425(4)                      |          |                  |  |
| Yb(1)–O(7)#4          | 2.376(3) | Ln(1)–O(8)                    | 2.328(4) | 2.438(4)                      |          |                  |  |
| Yb(1)–O(7)            | 2.486(3) | Ln(1)–O(9)                    | 2.414(3) | 2.465(4)                      |          |                  |  |
| <b>5</b> (Ln=Tb)      |          | <b>6</b> (Ln=Sm)              |          | <b>7</b> (Ln=Dy)              |          | <b>8</b> (Ln=Gd) |  |
| Ln(1)–O(10)           | 2.375(3) | 2.397(2)                      | 2.375(4) | 2.365(3)                      |          |                  |  |
| Ln(1)–O(9)            | 2.464(4) | 2.421(2)                      | 2.338(3) | 2.397(3)                      |          |                  |  |
| Ln(1)–O(2)            | 2.476(3) | 2.439(2)                      | 2.472(3) | 2.487(2)                      |          |                  |  |
| Ln(1)–O(5)            | 2.418(3) | 2.456(2)                      | 2.411(3) | 2.547(3)                      |          |                  |  |
| Ln(1)–O(3)            | 2.436(4) | 2.468(2)                      | 2.417(3) | 2.451(3)                      |          |                  |  |
| Ln(1)–O(4)            | 2.471(3) | 2.504(2)                      | 2.459(3) | 2.486(2)                      |          |                  |  |
| Ln(1)–O(1)            | 2.397(3) | 2.510(2)                      | 2.394(3) | 2.417(2)                      |          |                  |  |
| Ln(1)–O(11)           | 2.346(3) | 2.513(2)                      | 2.459(3) | 2.486(3)                      |          |                  |  |
| Ln(1)–O(6)            | 2.531(3) | 2.559(2)                      | 2.532(3) | 2.431(3)                      |          |                  |  |

<sup>a</sup> Symmetry transformations used to generate equivalent atoms: (a) #1:  $-x+1, -y+2, -z+1$ ; #2:  $x-1, y, z$ ; #3:  $-x, -y+1, -z$ ; #4:  $-x+1, -y+2, -z$ ; (b) #1:  $-x-1, -y, -z$ ; #2:  $x+1, y, z$ ; #3:  $-x-1, -y+1, -z$ ; #4:  $-x, -y, -z$ ; (c) #1:  $x-1, y, z$ ; #2:  $-x+1, -y+1, -z$ ; (d) #1:  $-x+1, -y+1, -z+1$ ; #2:  $-x, -y+1, -z+1$ .

**Table S2** Selected bond angles (°) for coordination polymers **1–8<sup>a</sup>**

| 1 <sup>a</sup>      |            |                     |            |                     |                   |                     |            |            |            |
|---------------------|------------|---------------------|------------|---------------------|-------------------|---------------------|------------|------------|------------|
| O(2)#1–Pr(1)–O(1)   | 76.04(14)  | O(3)#1–Pr(1)–O(4)#2 | 104.78(14) | O(3)#1–Pr(1)–O(7)   | 74.65(14)         | O(7)–Pr(1)–N(1)#4   | 139.03(15) |            |            |
| O(2)#1–Pr(1)–O(5)   | 130.37(13) | O(2)#1–Pr(1)–O(6)#3 | 67.53(13)  | O(4)#2–Pr(1)–O(7)   | 110.48(15)        | O(2)#1–Pr(1)–O(3)#2 | 140.31(13) |            |            |
| O(1)–Pr(1)–O(5)     | 133.55(13) | O(1)–Pr(1)–O(6)#3   | 132.36(14) | O(6)#3–Pr(1)–O(7)   | 72.06(14)         | O(1)–Pr(1)–O(3)#2   | 95.47(15)  |            |            |
| O(2)#1–Pr(1)–O(3)#1 | 69.62(13)  | O(5)–Pr(1)–O(6)#3   | 63.92(12)  | O(2)#1–Pr(1)–N(1)#4 | 84.64(15)         | O(5)–Pr(1)–O(3)#2   | 83.48(13)  |            |            |
| O(1)–Pr(1)–O(3)#1   | 70.61(13)  | O(3)#1–Pr(1)–O(6)#3 | 120.13(12) | O(1)–Pr(1)–N(1)#4   | 75.80(15)         | O(3)#1–Pr(1)–O(3)#2 | 71.00(14)  |            |            |
| O(5)–Pr(1)–O(3)#1   | 147.40(13) | O(4)#2–Pr(1)–O(6)#3 | 133.02(14) | O(5)–Pr(1)–N(1)#4   | 71.01(15)         | O(4)#2–Pr(1)–O(3)#2 | 49.91(12)  |            |            |
| O(2)#1–Pr(1)–O(4)#2 | 148.74(14) | O(2)#1–Pr(1)–O(7)   | 97.88(16)  | O(3)#1–Pr(1)–N(1)#4 | 141.49(15)        | O(6)#3–Pr(1)–O(3)#2 | 132.16(13) |            |            |
| O(1)–Pr(1)–O(4)#2   | 73.24(14)  | O(1)–Pr(1)–O(7)     | 144.67(14) | O(4)#2–Pr(1)–N(1)#4 | 82.46(14)         | O(7)–Pr(1)–O(3)#2   | 66.83(15)  |            |            |
| O(5)–Pr(1)–O(4)#2   | 71.02(14)  | O(5)–Pr(1)–O(7)     | 76.84(15)  | O(6)#3–Pr(1)–N(1)#4 | 71.33(14)         | N(1)#4–Pr(1)–O(3)#2 | 131.50(13) |            |            |
| 2 <sup>b</sup>      |            |                     |            |                     |                   |                     |            |            |            |
| O(1)–Yb(1)–O(4)#1   | 114.83(12) | O(4)#1–Yb(1)–O(5)#3 | 72.70(12)  | O(5)#3–Yb(1)–O(6)   | 69.64(11)         | O(1)–Yb(1)–O(7)     | 76.07(11)  |            |            |
| O(1)–Yb(1)–O(3)#2   | 77.52(12)  | O(3)#2–Yb(1)–O(5)#3 | 125.51(11) | O(1)–Yb(1)–O(7)#4   | 143.11(11)        | O(4)#1–Yb(1)–O(7)   | 71.22(11)  |            |            |
| O(4)#1–Yb(1)–O(3)#2 | 138.64(11) | O(8)–Yb(1)–O(5)#3   | 73.96(12)  | O(4)#1–Yb(1)–O(7)#4 | 76.73(11)         | O(3)#2–Yb(1)–O(7)   | 74.46(11)  |            |            |
| O(1)–Yb(1)–O(8)     | 83.92(12)  | O(1)–Yb(1)–O(6)     | 72.91(11)  | O(8)–Yb(1)–O(7)#4   | 72.79(11)         | O(5)#3–Yb(1)–O(7)   | 143.88(11) |            |            |
| O(4)#1–Yb(1)–O(8)   | 144.90(12) | O(4)#1–Yb(1)–O(6)   | 75.93(11)  | O(2)–Yb(1)–O(7)#4   | 106.63(11)        | O(8)–Yb(1)–O(7)     | 138.90(11) |            |            |
| O(3)#2–Yb(1)–O(8)   | 72.00(11)  | O(3)#2–Yb(1)–O(6)   | 142.62(11) | O(5)#3–Yb(1)–O(7)#4 | 77.91(11)         | O(6)–Yb(1)–O(7)     | 118.59(10) |            |            |
| O(1)–Yb(1)–O(5)#3   | 138.39(11) | O(8)–Yb(1)–O(6)     | 82.51(11)  | O(6)–Yb(1)–O(7)#4   | 142.41(11)        | O(7)#4–Yb(1)–O(7)   | 75.28(11)  |            |            |
| 3 <sup>c</sup>      |            |                     |            |                     |                   |                     |            |            |            |
| O(1)–Ho(1)–O(8)     | 139.62(13) | O(8)–Ho(1)–O(6)     | 71.16(13)  | O(6)–Ho(1)–O(5)     | 67.30(11)         | O(1)–Ho(1)–O(7)     | 73.34(13)  |            |            |
| O(1)–Ho(1)–O(2)#1   | 144.18(13) | O(2)#1–Ho(1)–O(6)   | 107.73(13) | O(1)–Ho(1)–O(9)     | 69.19(12)         | O(8)–Ho(1)–O(7)     | 140.82(13) |            |            |
| O(8)–Ho(1)–O(2)#1   | 76.20(13)  | O(3)#2–Ho(1)–O(6)   | 143.97(12) | O(8)–Ho(1)–O(9)     | 71.94(13)         | O(2)#1–Ho(1)–O(7)   | 74.21(13)  |            |            |
| O(1)–Ho(1)–O(3)#2   | 99.70(13)  | O(1)–Ho(1)–O(5)     | 81.48(13)  | O(2)#1–Ho(1)–O(9)   | 144.25(12)        | O(3)#2–Ho(1)–O(7)   | 72.55(12)  |            |            |
| O(8)–Ho(1)–O(3)#2   | 79.66(12)  | O(8)–Ho(1)–O(5)     | 119.72(13) | O(3)#2–Ho(1)–O(9)   | 74.23(12)         | O(6)–Ho(1)–O(7)     | 142.95(12) |            |            |
| O(2)#1–Ho(1)–O(3)#2 | 84.59(12)  | O(2)#1–Ho(1)–O(5)   | 77.13(12)  | O(6)–Ho(1)–O(9)     | 76.91(12)         | O(5)–Ho(1)–O(7)     | 77.60(12)  |            |            |
| O(1)–Ho(1)–O(6)     | 89.64(14)  | O(3)#2–Ho(1)–O(5)   | 148.28(12) | O(5)–Ho(1)–O(9)     | 133.45(12)        | O(9)–Ho(1)–O(7)     | 123.77(12) |            |            |
| 4 <sup>d</sup>      |            |                     |            |                     |                   |                     |            |            |            |
| O(4)#1–Tb(1)–O(3)#2 | 144.05(13) | O(3)#2–Tb(1)–O(5)   | 106.85(13) | O(5)–Tb(1)–O(6)     | 66.70(12)         | O(4)#1–Tb(1)–O(9)   | 73.43(13)  |            |            |
| O(4)#1–Tb(1)–O(7)   | 139.55(14) | O(7)–Tb(1)–O(5)     | 71.00(14)  | O(4)#1–Tb(1)–O(8)   | 69.30(13)         | O(3)#2–Tb(1)–O(9)   | 74.40(13)  |            |            |
| O(3)#2–Tb(1)–O(7)   | 76.39(14)  | O(1)–Tb(1)–O(5)     | 143.60(13) | O(3)#2–Tb(1)–O(8)   | 144.67(13)        | O(7)–Tb(1)–O(9)     | 141.03(14) |            |            |
| O(4)#1–Tb(1)–O(1)   | 100.50(13) | O(4)#1–Tb(1)–O(6)   | 80.51(13)  | O(7)–Tb(1)–O(8)     | 71.86(13)         | O(1)–Tb(1)–O(9)     | 73.26(13)  |            |            |
| O(3)#2–Tb(1)–O(1)   | 85.13(13)  | O(3)#2–Tb(1)–O(6)   | 77.35(13)  | O(1)–Tb(1)–O(8)     | 74.14(13)         | O(5)–Tb(1)–O(9)     | 142.72(13) |            |            |
| O(7)–Tb(1)–O(1)     | 79.11(13)  | O(7)–Tb(1)–O(6)     | 119.97(13) | O(5)–Tb(1)–O(8)     | 77.11(12)         | O(6)–Tb(1)–O(9)     | 77.71(12)  |            |            |
| O(4)#1–Tb(1)–O(5)   | 89.59(14)  | O(1)–Tb(1)–O(6)     | 149.22(13) | O(6)–Tb(1)–O(8)     | 132.58(13)        | O(8)–Tb(1)–O(9)     | 123.93(12) |            |            |
| 5(Ln=Tb)            | 6(Ln=Sm)   | 7(Ln=Dy)            | 8(Ln=Gd)   | 5(Ln=Tb)            | 6(Ln=Sm)          | 7(Ln=Dy)            | 8(Ln=Gd)   |            |            |
| O(10)–Ln(1)–O(9)    | 136.02(12) | 75.78(9)            | 75.56(12)  | 76.21(11)           | O(5)–Ln(1)–O(1)   | 126.82(11)          | 148.99(9)  | 126.88(10) | 74.60(8)   |
| O(10)–Ln(1)–O(2)    | 71.47(13)  | 138.05(8)           | 71.90(11)  | 84.60(9)            | O(3)–Ln(1)–O(1)   | 82.87(11)           | 123.97(8)  | 82.68(10)  | 82.98(8)   |
| O(9)–Ln(1)–O(2)     | 70.18(12)  | 90.42(9)            | 84.41(10)  | 72.03(10)           | O(4)–Ln(1)–O(1)   | 133.72(11)          | 139.01(8)  | 133.77(11) | 133.57(8)  |
| O(10)–Ln(1)–O(5)    | 76.89(14)  | 89.39(8)            | 76.39(12)  | 132.55(9)           | O(10)–Ln(1)–O(11) | 76.27(14)           | 79.25(8)   | 136.42(11) | 79.21(10)  |
| O(9)–Ln(1)–O(5)     | 138.65(12) | 76.90(9)            | 88.39(11)  | 69.58(9)            | O(9)–Ln(1)–O(11)  | 79.84(13)           | 136.60(8)  | 79.96(12)  | 136.45(9)  |
| O(2)–Ln(1)–O(5)     | 148.35(13) | 126.31(7)           | 148.28(12) | 113.57(8)           | O(2)–Ln(1)–O(11)  | 85.16(12)           | 85.02(8)   | 70.29(11)  | 70.34(9)   |
| O(10)–Ln(1)–O(3)    | 149.20(12) | 126.99(7)           | 149.09(11) | 127.50(9)           | O(5)–Ln(1)–O(11)  | 88.13(14)           | 137.83(8)  | 138.51(11) | 147.43(9)  |
| O(9)–Ln(1)–O(3)     | 73.07(12)  | 149.64(8)           | 128.02(10) | 148.90(9)           | O(3)–Ln(1)–O(11)  | 127.36(11)          | 72.57(8)   | 72.98(12)  | 73.21(9)   |
| O(2)–Ln(1)–O(3)     | 124.15(12) | 83.29(7)            | 124.25(10) | 124.28(9)           | O(4)–Ln(1)–O(11)  | 75.44(12)           | 70.02(8)   | 70.24(11)  | 70.21(9)   |
| O(5)–Ln(1)–O(3)     | 83.88(14)  | 83.04(9)            | 83.95(13)  | 79.36(9)            | O(1)–Ln(1)–O(11)  | 138.52(12)          | 70.90(8)   | 84.46(11)  | 84.81(9)   |
| O(10)–Ln(1)–O(4)    | 135.31(15) | 75.83(8)            | 134.63(12) | 75.97(9)            | O(10)–Ln(1)–O(6)  | 70.13(11)           | 132.42(8)  | 70.16(11)  | 88.84(10)  |
| O(9)–Ln(1)–O(4)     | 70.37(12)  | 134.37(9)           | 75.86(11)  | 134.91(12)          | O(9)–Ln(1)–O(6)   | 146.90(11)          | 70.03(8)   | 132.43(11) | 76.42(11)  |
| O(2)–Ln(1)–O(4)     | 138.40(12) | 133.74(7)           | 138.24(10) | 138.51(9)           | O(2)–Ln(1)–O(6)   | 113.66(11)          | 74.86(7)   | 113.85(10) | 148.43(10) |
| O(5)–Ln(1)–O(4)     | 68.33(12)  | 67.83(8)            | 68.31(11)  | 106.49(8)           | O(5)–Ln(1)–O(6)   | 52.42(10)           | 51.66(7)   | 52.46(10)  | 52.24(8)   |
| O(3)–Ln(1)–O(4)     | 53.30(11)  | 52.73(7)            | 53.57(10)  | 53.00(8)            | O(3)–Ln(1)–O(6)   | 79.08(11)           | 79.67(7)   | 78.96(10)  | 83.64(11)  |
| O(10)–Ln(1)–O(1)    | 89.60(15)  | 85.29(8)            | 90.23(13)  | 137.98(9)           | O(4)–Ln(1)–O(6)   | 106.50(11)          | 106.12(7)  | 106.55(11) | 68.27(9)   |
| O(9)–Ln(1)–O(1)     | 84.47(12)  | 72.17(9)            | 138.04(11) | 90.01(12)           | O(1)–Ln(1)–O(6)   | 74.51(11)           | 113.37(7)  | 74.54(11)  | 126.68(9)  |
| O(2)–Ln(1)–O(1)     | 53.37(10)  | 52.78(7)            | 53.64(9)   | 53.39(8)            | O(11)–Ln(1)–O(6)  | 132.40(12)          | 147.36(7)  | 146.78(11) | 138.42(9)  |

<sup>a</sup> Symmetry transformations used to generate equivalent atoms: (a) #1:  $-x+1, -y+2, -z+1$ ; #2:  $x-1, y, z$ ; #3:  $-x, -y+1, -z$ ; #4:  $-x+1, -y+2, -z$ ; (b) #1:  $-x-1, -y, -z$ ; #2:  $x+1, y, z$ ; #3:  $-x-1, -y+1, -z$ ; #4:  $-x, -y, -z$ ; (c) #1:  $x-1, y, z$ ; #2:  $-x+1, -y+1, -z$ ; (d) #1:  $-x+1, -y+1, -z+1$ ; #2:  $-x, -y+1, -z+1$ .

**Table S3** Important hydrogen bond interactions in coordination polymers **1–8<sup>a</sup>**

| <b>1</b>                   |        |          |        |          |
|----------------------------|--------|----------|--------|----------|
| O7–H7A···OW1               | 0.850  | 2.204    | 122.29 | 2.754    |
| O7–H7B···O1 <sup>a</sup>   | 0.850  | 2.410    | 116.55 | 2.892    |
| N2–H2A···O5 <sup>l</sup>   | 0.860  | 1.922    | 156.84 | 2.733    |
| OW1–HW1A···O6 <sup>b</sup> | 0.850  | 2.359    | 132.39 | 2.998    |
| <b>2</b>                   |        |          |        |          |
| O7–H7A···O6 <sup>c</sup>   | 0.970  | 1.968    | 147.03 | 2.831    |
| O7–H7B···O2                | 0.970  | 1.737    | 141.02 | 2.564    |
| O8–H8A···N2 <sup>d</sup>   | 0.960  | 1.863    | 150.13 | 2.738    |
| O8–H8B···O2 <sup>e</sup>   | 0.960  | 1.772    | 162.08 | 2.701    |
| N1–H1A···O8 <sup>f</sup>   | 0.860  | 2.416    | 141.73 | 3.137    |
| <b>3</b>                   |        |          |        |          |
| O7–H7B···O3                | 0.850  | 2.163    | 144.72 | 2.898    |
| O8–H8B···N1 <sup>g</sup>   | 0.850  | 2.323    | 113.25 | 2.770    |
| O9–H9A···O4 <sup>h</sup>   | 0.850  | 2.211    | 127.43 | 2.810    |
| N1–H1A···O8 <sup>g</sup>   | 0.860  | 2.129    | 131.05 | 2.770    |
| N1–H1A···O9 <sup>i</sup>   | 0.860  | 2.471    | 115.38 | 2.944    |
| <b>4</b>                   |        |          |        |          |
| O7–H7B···O2                | 0.960  | 1.741    | 145.41 | 2.589    |
| O7–H7C···N1 <sup>b</sup>   | 0.960  | 2.281    | 110.34 | 2.765    |
| O8–H8A···O2 <sup>j</sup>   | 0.960  | 2.137    | 124.64 | 2.797    |
| O9–H9B···O4                | 0.960  | 2.317    | 162.54 | 3.246    |
| O9–H9B···O3                | 0.960  | 2.440    | 141.08 | 3.243    |
| O9–H9C···O1 <sup>g</sup>   | 0.960  | 2.077    | 143.05 | 2.902    |
| N2–H2A···O6 <sup>k</sup>   | 0.860  | 2.004    | 175.20 | 2.862    |
| <b>5</b>                   |        |          |        |          |
| O7–H7···O10 <sup>l</sup>   | 0.820  | 1.853    | 161.06 | 2.642    |
| O9–H9B···O1 <sup>m</sup>   | 0.850  | 2.373    | 121.47 | 2.909    |
| O9–H9B···O3 <sup>m</sup>   | 0.850  | 2.500    | 125.16 | 3.070    |
| O10–H10C···O8              | 0.850  | 2.354    | 112.91 | 2.797    |
| O11–H11A···OW1             | 0.850  | 2.185    | 120.43 | 2.716    |
| O11–H11B···O8 <sup>n</sup> | 0.850  | 1.998    | 135.84 | 2.674    |
| N1–H1A···OW3 <sup>o</sup>  | 0.860  | 1.983    | 164.19 | 2.820    |
| N3–H3A···OW2               | 0.860  | 1.792    | 170.63 | 2.644    |
| OW1–HW1A···O3 <sup>m</sup> | 0.850  | 2.488    | 129.73 | 3.101    |
| OW1–HW1A···O1 <sup>p</sup> | 0.850  | 2.660    | 115.99 | 3.127    |
| OW2–HW2B···N2              | 0.850  | 2.060    | 138.09 | 2.752    |
| OW2–HW2C···O2 <sup>q</sup> | 0.850  | 2.185    | 124.49 | 2.757    |
| OW3–HW3B···O7 <sup>r</sup> | 0.850  | 1.807    | 173.48 | 2.653    |
| OW3–HW3C···O4 <sup>s</sup> | 0.850  | 2.167    | 138.52 | 2.859    |
| OW3–HW3C···O5 <sup>s</sup> | 0.850  | 2.282    | 134.28 | 2.940    |
| <b>6</b>                   |        |          |        |          |
| D–H···A                    | d(D–H) | d(H···A) | <DHA   | d(D···A) |
| O7–H7···O9 <sup>t</sup>    | 0.820  | 1.859    | 162.17 | 2.652    |
| O9–H9B···O8                | 0.850  | 2.350    | 113.75 | 2.802    |
| O10–H10A···OW3             | 0.850  | 2.240    | 114.42 | 2.705    |
| O10–H10C···O8 <sup>m</sup> | 0.850  | 2.056    | 129.21 | 2.676    |
| O11–H11A···OW1             | 0.850  | 2.219    | 159.72 | 3.031    |

|                             |       |       |        |       |
|-----------------------------|-------|-------|--------|-------|
| O11–H11B···O2 <sup>n</sup>  | 0.850 | 2.360 | 122.86 | 2.910 |
| O11–H11B···O3 <sup>n</sup>  | 0.850 | 2.503 | 123.40 | 3.055 |
| N1–H1A···OW1 <sup>u</sup>   | 0.860 | 1.817 | 168.70 | 2.665 |
| N3–H3A···OW2 <sup>q</sup>   | 0.860 | 1.990 | 164.83 | 2.829 |
| OW1–HW1A···N4 <sup>s</sup>  | 0.850 | 2.268 | 116.38 | 2.753 |
| OW2–HW2A···O7 <sup>p</sup>  | 0.850 | 1.897 | 148.88 | 2.661 |
| OW2–HW2C···O4               | 0.850 | 2.060 | 159.77 | 2.872 |
| OW3–HW3A···O6 <sup>p</sup>  | 0.850 | 2.373 | 148.52 | 3.129 |
| OW3–HW3B···O3 <sup>n</sup>  | 0.850 | 2.383 | 146.05 | 3.124 |
| OW3–HW3B···O2 <sup>p</sup>  | 0.850 | 2.505 | 130.29 | 3.123 |
| <b>7</b>                    |       |       |        |       |
| O8–H8···O9 <sup>l</sup>     | 0.820 | 2.007 | 138.12 | 2.674 |
| O9–H9A···OW3                | 0.850 | 2.248 | 114.29 | 2.711 |
| O10–H10A···O7 <sup>n</sup>  | 0.850 | 1.857 | 154.39 | 2.649 |
| O10–H10C···O8               | 0.850 | 2.345 | 112.96 | 2.788 |
| O11–H11A···OW1              | 0.850 | 2.199 | 160.37 | 3.013 |
| O11–H11B···O1 <sup>m</sup>  | 0.850 | 2.335 | 124.34 | 2.900 |
| O11–H11B···O3 <sup>m</sup>  | 0.850 | 2.521 | 123.80 | 3.076 |
| N1–H1A···OW2 <sup>v</sup>   | 0.860 | 1.991 | 164.78 | 2.830 |
| N3–H3A···OW1 <sup>w</sup>   | 0.860 | 1.804 | 170.19 | 2.655 |
| OW1–HW1A···N2 <sup>x</sup>  | 0.850 | 2.274 | 116.39 | 2.759 |
| OW2–HW2B···O4               | 0.850 | 2.066 | 156.09 | 2.864 |
| OW2–HW2C···O7 <sup>p</sup>  | 0.850 | 2.017 | 133.09 | 2.671 |
| OW3–HW3A···O6 <sup>p</sup>  | 0.850 | 2.387 | 147.59 | 3.138 |
| OW3–HW3B···O3 <sup>m</sup>  | 0.850 | 2.367 | 146.80 | 3.113 |
| OW3–HW3B···O1 <sup>p</sup>  | 0.850 | 2.547 | 129.00 | 3.152 |
| <b>8</b>                    |       |       |        |       |
| O8–H8···O10 <sup>b</sup>    | 0.820 | 2.014 | 137.65 | 2.678 |
| O9–H9A···O7 <sup>t</sup>    | 0.850 | 1.864 | 154.75 | 2.658 |
| O10–H10A···OW3              | 0.850 | 2.255 | 114.47 | 2.719 |
| O11–H11C···O1 <sup>l</sup>  | 0.850 | 2.358 | 123.34 | 2.913 |
| O11–H11C···O3 <sup>l</sup>  | 0.850 | 2.511 | 123.49 | 3.063 |
| N1–H1A···OW1 <sup>n</sup>   | 0.860 | 2.044 | 136.84 | 2.735 |
| N4–H4A···OW2 <sup>y</sup>   | 0.860 | 1.864 | 167.77 | 2.711 |
| OW1–HW1A···N3               | 0.850 | 1.837 | 161.65 | 2.657 |
| OW1–HW1C···O11 <sup>u</sup> | 0.850 | 2.232 | 150.46 | 3.001 |
| OW2–HW2B···O4               | 0.850 | 2.050 | 160.44 | 2.865 |
| OW2–HW2C···N2 <sup>u</sup>  | 0.850 | 2.142 | 138.41 | 2.834 |
| OW3–HW3A···O5 <sup>e</sup>  | 0.850 | 2.370 | 148.53 | 3.127 |

<sup>a</sup> Symmetry transformations used to generate equivalent atoms: (a)  $-x, -y+2, -z+1$ ; (b)  $x, y, z+1$ ; (c)  $-x-1, -y, -z$ ; (d)  $-x, -y, -z-1$ ; (e)  $x, y+1, z$ ; (f)  $-x-1, -y, -z-1$ ; (g)  $-x+1, -y+1, -z+1$ ; (h)  $x-1, y-1, z$ ; (i)  $-x+2, -y+1, -z+1$ ; (j)  $-x, -y, -z+1$ ; (k)  $x-1, y-1, z-1$ ; (l)  $-x, y+1/2, -z+1/2$ ; (m)  $-x+1, y-1/2, -z+1/2$ ; (n)  $-x, y-1/2, -z+1/2$ ; (o)  $x+1, y-1, z$ ; (p)  $x, y-1, z$ ; (q)  $x, -y+1/2, z-1/2$ ; (r)  $-x, -y+2, -z$ ; (s)  $-x, -y+1, -z$ ; (t)  $-x+1, y+1/2, -z+1/2$ ; (u)  $x, -y+1/2, z+1/2$ ; (v)  $x, -y+3/2, z+1/2$ ; (w)  $x, -y+3/2, z-1/2$ ; (x)  $-x+1, -y+2, -z+1$ ; (y)  $-x+1, -y, -z+1$ .

**Table S4** Thermal decomposition data for coordination polymers **1–8**

| Stage    | Temperature Range (°C) | Mass loss (%)<br>obsd | calcd | Probable composition of removed groups                                          |
|----------|------------------------|-----------------------|-------|---------------------------------------------------------------------------------|
| <b>1</b> |                        |                       |       |                                                                                 |
| I        | 110–250                | 9.05                  | 8.48  | 1 free water molecules and 1 coordination water molecules                       |
| II       | 350–600                | 51.87                 | 52.73 | 1 H <sub>3</sub> BIDC and 0.5 H <sub>2</sub> ox                                 |
| <b>2</b> |                        |                       |       |                                                                                 |
| I        | 65–250                 | 8.26                  | 7.89  | 2 free water molecules                                                          |
| II       | 350–600                | 48.39                 | 49.02 | 1 H <sub>3</sub> BIDC and 0.5 H <sub>2</sub> ox                                 |
| <b>3</b> |                        |                       |       |                                                                                 |
| I        | 120–320                | 11.09                 | 11.57 | 3 coordination water molecules                                                  |
| II       | 380–600                | 48.60                 | 47.98 | 1 H <sub>3</sub> BIDC and 0.5 H <sub>2</sub> ox                                 |
| <b>4</b> |                        |                       |       |                                                                                 |
| I        | 120–330                | 7.34                  | 7.81  | 2 coordination water molecules                                                  |
| II       | 330–600                | 51.83                 | 52.52 | 1 coordination water molecules, 1 H <sub>3</sub> BIDC and 0.5 H <sub>2</sub> ox |
| <b>5</b> |                        |                       |       |                                                                                 |
| I        | 100–300                | 15.82                 | 15.98 | 3 free water molecules and 3 coordination water molecules                       |
| II       | 300–600                | 56.47                 | 56.97 | 2 H <sub>3</sub> BIDC                                                           |
| <b>6</b> |                        |                       |       |                                                                                 |
| I        | 105–300                | 12.14                 | 12.14 | 3 free water molecules and 1.5 coordination water molecules                     |
| II       | 350–600                | 62.00                 | 61.75 | 1.5 coordination water molecules and 2 H <sub>3</sub> BIDC                      |
| <b>7</b> |                        |                       |       |                                                                                 |
| I        | 110–300                | 12.86                 | 13.25 | 3 free water molecules and 2 coordination water molecules                       |
| II       | 350–600                | 61.12                 | 59.32 | 1 coordination water molecules and 2 H <sub>3</sub> BIDC                        |
| <b>8</b> |                        |                       |       |                                                                                 |
| I        | 110–300                | 13.37                 | 13.49 | 3 free water molecules and 2 coordination water molecules                       |
| II       | 350–600                | 60.58                 | 59.78 | 1 coordination water molecules and 2 H <sub>3</sub> BIDC                        |

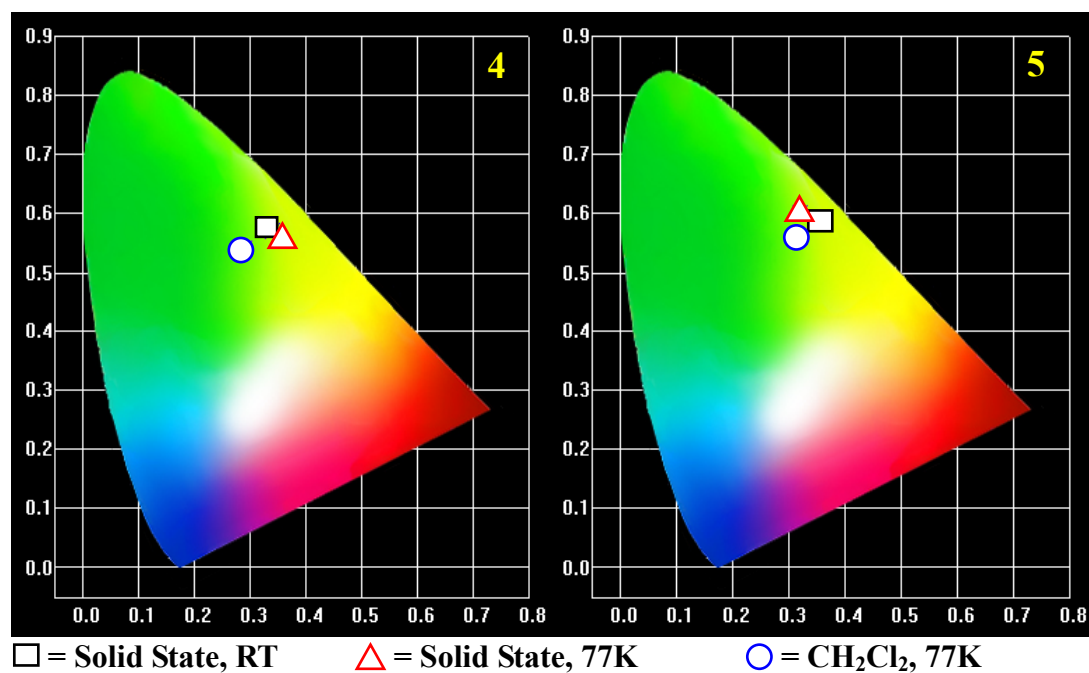

Fig. S1 The color coordinate diagram of coordination polymers 4 (Left) and 5 (Right).

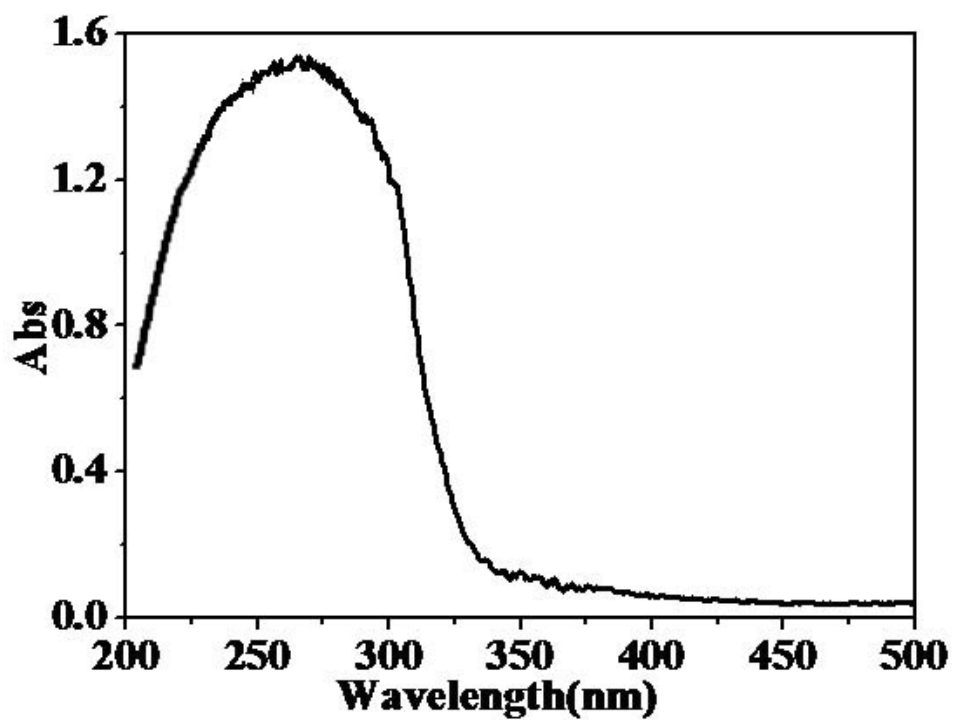

Fig. S2 UV - Vis absorption spectrum of the H<sub>3</sub>BIDC ligand in solid-state.

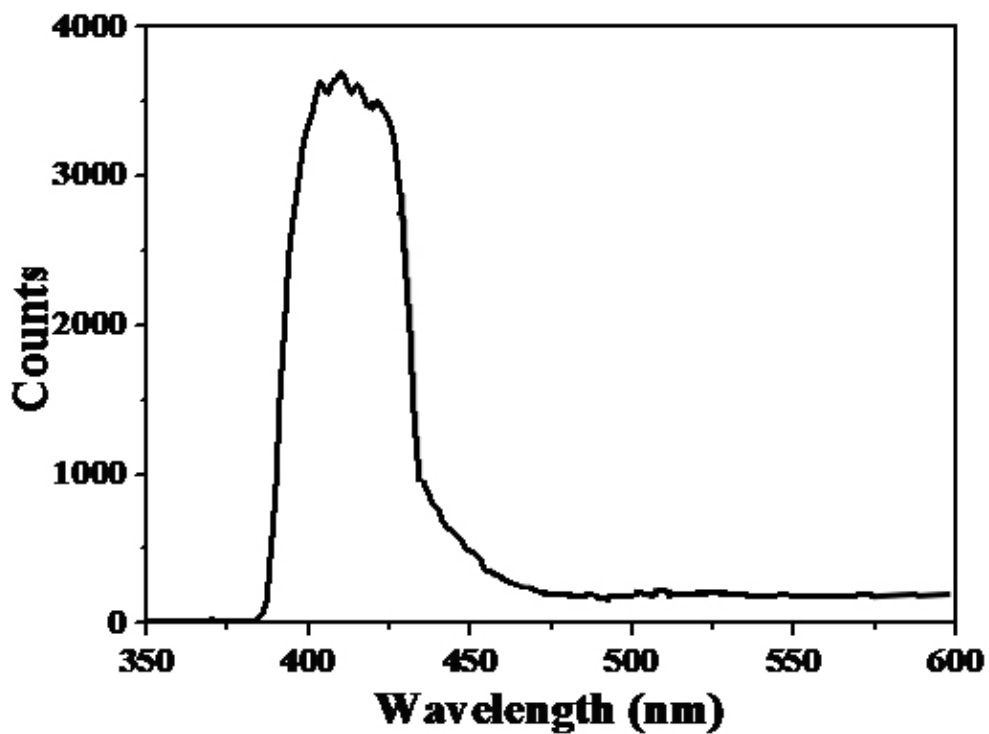

Fig. S3 Phosphorescence spectra of coordination polymer **8** in the solid-state at low-temperature.

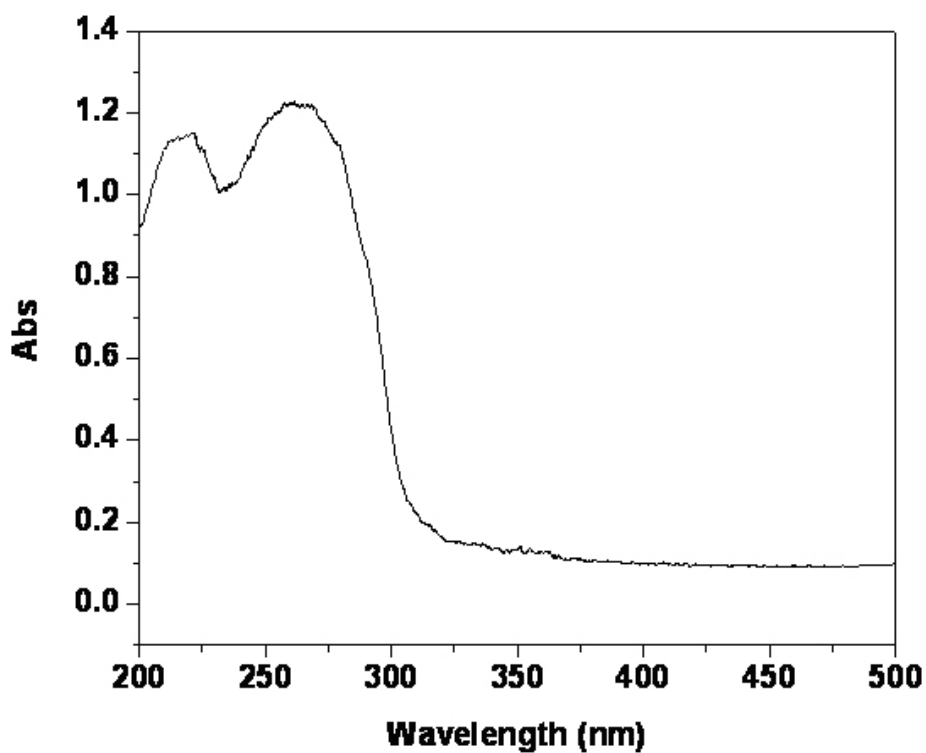

Fig. S4 UV - Vis absorption spectrum of the oxalic acid ligand in solid-state.

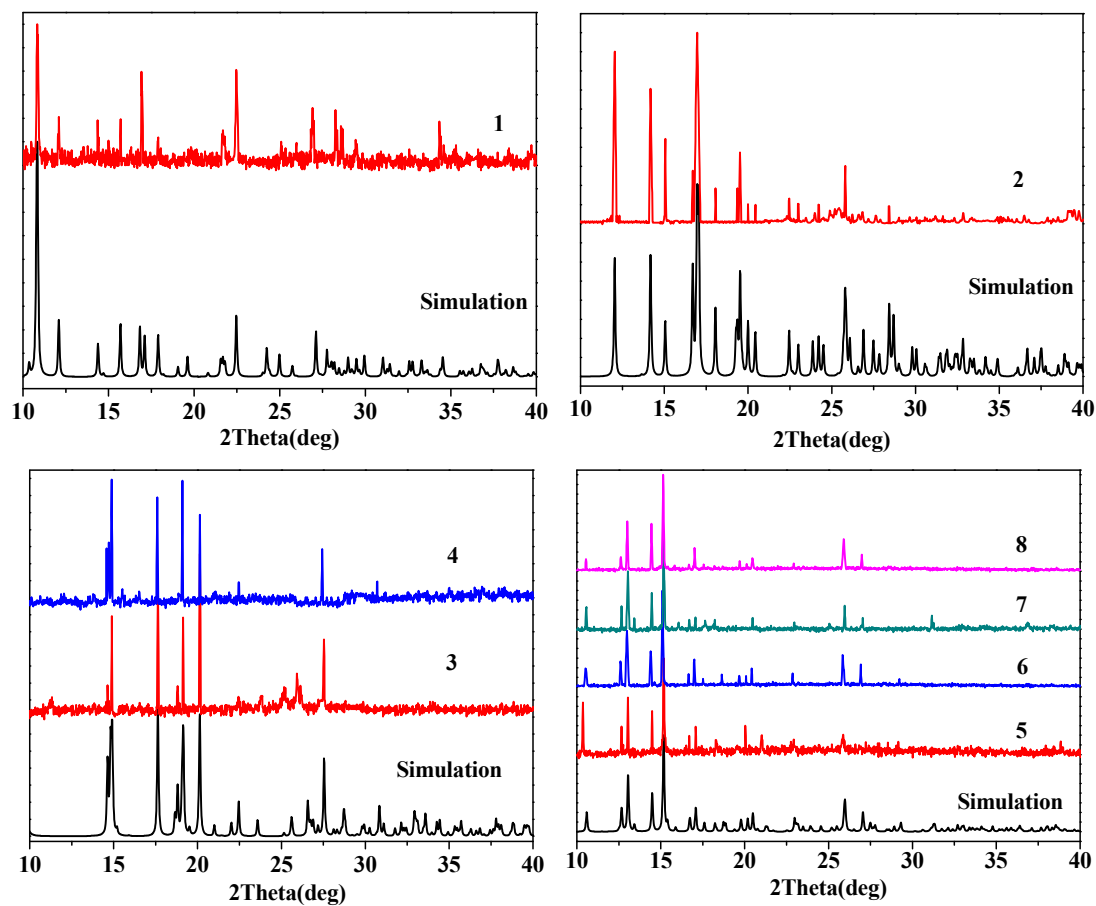

Fig. S5 PXRD patterns of 1–8 compared with a simulated pattern.

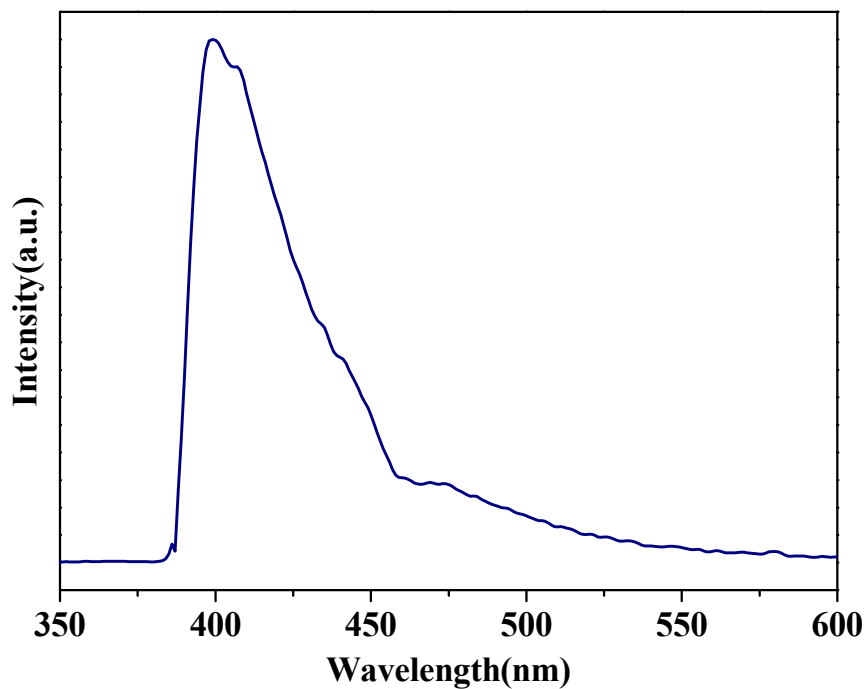

Fig. S6 The emission spectrum of the H<sub>3</sub>BIDC ligand in solid-state at 298 K.



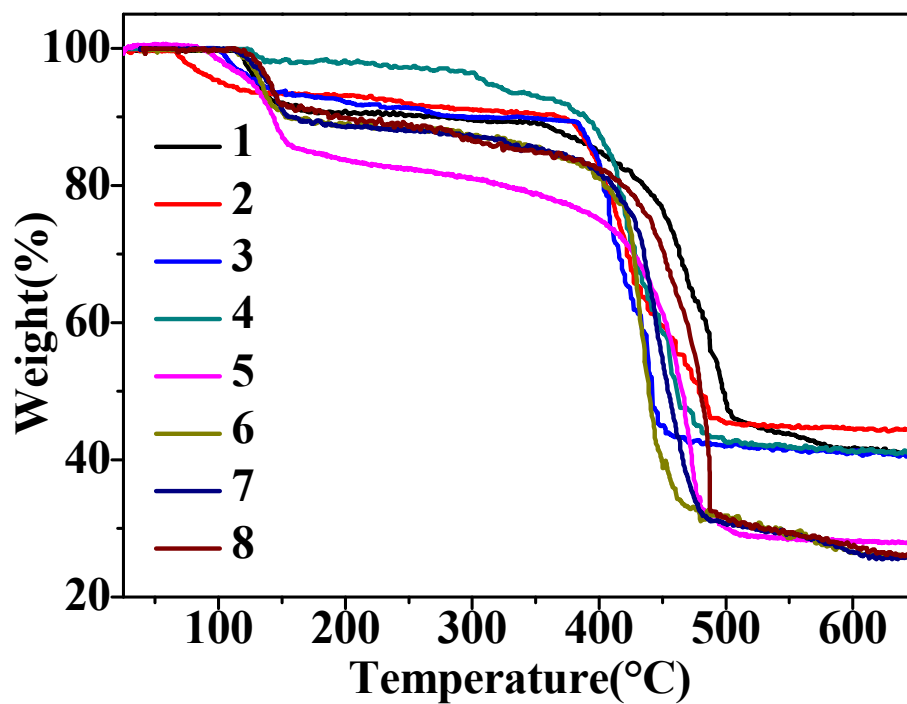

Fig. S7 Thermogravimetric curves of coordination polymers 1–8.
